# Supplementary material
Source: HighWire-hosted journal article supplement (https://tobaccocontrol.bmj.com/highwire/filestream/165044/field_highwire_adjunct_files/0/tc-2022-057577supp001_data_supplement.pdf)
Supplement: tc-2022-057577supp001_data_supplement.pdf [file tc-2022-057577supp001_data_supplement.pdf]

## APPENDIX A

### DCE Task Instructions and Questions

#### Attitude Task

- Which message would make you feel most POSITIVE and which would make you feel most NEGATIVE about the policy of reducing nicotine in cigarettes?
  - [Choices]
    - Makes me feel most POSITIVE about policy
    - Makes me feel most NEGATIVE about policy
  
- Do you agree or disagree with the following statement?
  - All the messages would make me feel the same way about the policy.
    - [Choices]
      - Agree
      - Disagree

#### Harm Task

- Which message would MOST make you think cigarettes are harmful and which message would LEAST make you think cigarettes are harmful?
  - [Choices]
    - Makes me think cigarettes MOST harmful
    - Makes me think cigarettes LEAST harmful
  
- Do you agree or disagree with the following statement?
  - All the messages would have the same effect on how I think about the harms of cigarettes.
    - [Choices]
      - Agree
      - Disagree

#### Behavioral Motivation (to try) Task

- Which message would MOST interest you and which would LEAST interest you in trying cigarettes?
  - [Choices]

## Very Low Nicotine Cigarette Message Experiment

2

- Interests me the MOST to try cigarettes
- Interests me the LEAST to try cigarettes
- Do you agree or disagree with the following statement?
  - All the messages would have the same effect on my interest to try smoking.
    - [Choices]
      - Agree
      - Disagree

**Behavioral Motivation (to quit) Task**

- Which message would MOST motivate you and which would LEAST motivate you to quit smoking?
  - [Choices]
    - Motivates me the MOST to quit cigarettes
    - Motivates me the LEAST to quit cigarettes
- Do you agree or disagree with the following statement?
  - All the messages would have the same effect on my motivation to quit smoking.
    - [Choices]
      - Agree
      - Disagree
